# Supplementary material for: Balloon Angioplasty for Symptomatic Intracranial Artery Stenosis (BASIS): protocol of a prospective, multicentre, randomised, controlled trial
Source: HighWire-hosted journal article supplement (doi:10.1136/svn-2022-002288), 2023-05-18
Supplement: svn-2022-002288supp001_data_supplement.pdf [file svn-2022-002288supp001_data_supplement.pdf]

**Supplemental Table 1. List of Basis site**

| Basis site                                                                                | Investigator   |
|-------------------------------------------------------------------------------------------|----------------|
| Beijing Tian Tan Hospital, Capital Medical University                                     | Zhongrong Miao |
| Beijing Tian Tan Hospital, Capital Medical University                                     | Yilong Wang    |
| The Affiliated Hospital of Qingdao University                                             | Yong Zhang     |
| Nanjing Drum Tower Hospital, The Affiliated Hospital of Nanjing University Medical School | Yun Xu         |
| Henan Provincial People's Hospital                                                        | Tianxiao Li    |
| The Second Affiliated Hospital of Guangzhou Medical University                            | Yunxiang Ji    |
| Beijing Luhe Hospital, Capital Medical University                                         | Xiaokun Geng   |
| The First Hospital of Jilin University                                                    | Shouchun Wang  |
| Qilu Hospital of Shandong University                                                      | Wei Wu         |
| Hunan Provincial People's Hospital                                                        | Xiaoping Gao   |
| The First Affiliated Hospital, Sun Yat-sen University                                     | Jinsheng Zeng  |
| The Affiliated Hospital of Guizhou Medical University                                     | Xin Xiang      |
| Shandong Provincial Hospital                                                              | Yifeng Du      |
| General Hospital of The Northern Theater of The Chinese People's Liberation Army          | Huisheng Chen  |
| Guangdong Sanjiu Brain Hospital                                                           | Peiming Wang   |
| Shenzhen Hospital of Southern Medical University                                          | Yajie Liu      |
| West China Hospital Sichuan University                                                    | Hongbo Zheng   |
| Wuhan NO.1 Hospital                                                                       | Wenhua Liu     |
| The First Affiliated Hospital of Anhui Medical University                                 | Weimin Yang    |
| Jiangxi Provincial People's Hospital                                                      | Wenfeng Cao    |
| Liaocheng People's Hospital                                                               | Guisheng Jiang |
| The First Affiliated Hospital of Xi'an Jiaotong University                                | Jianfeng Han   |
| The First People's Hospital of Changzhou                                                  | Ya Peng        |
| Chinese PLA General Hospital                                                              | Jun Wang       |
| Beijing Chao-Yang Hospital, Capital Medical University                                    | Yang Wang      |
| The First Affiliated Hospital of Anhui University of CM                                   | Weimin Yang    |
| Beijing Fengtai You Anmen Hospital                                                        | Shiyong Zhang  |
| Dongfang Hospital Beijing University of Chinese Medicine                                  | Gesheng Wang   |

---

| Basis site                                                    | Investigator |
|---------------------------------------------------------------|--------------|
| Beijing ShunYi Hospital                                       | Liyu Wang    |
| The Second Affiliated Hospital Of NanJing Medical University  | Jin Wu       |
| Guangdong Provincial Hospital of Traditional Chinese Medicine | Guifu Li     |
| The Affiliated Hospital of Northwest University               | Mingze Chang |

---

**Supplemental Table 2. Cooperation team of trial and Study Committee**

| Cooperation team     | Unit or Hospital name                                                                                        | Investigator Name    |
|----------------------|--------------------------------------------------------------------------------------------------------------|----------------------|
| Sponsor              | Beijing Tian Tan Hospital, Capital Medical University                                                        | NA                   |
| CRO                  | Beijing Jingchengtong Medicine Technology Co., Ltd.                                                          | NA                   |
| Statistical analysis | Medical Statistics Office, Peking University First Hospital, Beijing, China                                  | NA                   |
| Imaging core lab     | China National Clinical Research Center for Neurological Diseases, Tiantan Neuroimaging Center of Excellence | Jing Jing            |
|                      | China National Clinical Research Center for Neurological Diseases, Tiantan Neuroimaging Center of Excellence | Nan Qi               |
| CEC team             | Tangdu Hospital of Air Force Medical University                                                              | Zhenwei Zhao         |
|                      | Beijing Tian Tan Hospital, Capital Medical University                                                        | Kehui Dong           |
|                      | The First Affiliated Hospital of Harbin Medical University                                                   | Huaizhang Shi        |
| DSMB                 | People's Liberation Army Air Force General Hospital                                                          | Jin Shi              |
|                      | Strategic Support Force Specialty Medical Center                                                             | Yiling Cai           |
|                      | China National Clinical Research Center for Neurological Diseases                                            | Yuesong Pan          |
| AE Committee         | Beijing Tian Tan Hospital, Capital Medical University                                                        | Xuan Sun             |
|                      | Beijing Tian Tan Hospital, Capital Medical University                                                        | Yiming Deng          |
|                      | Beijing Tian Tan Hospital, Capital Medical University                                                        | Ning Ma              |
| Steering Committee   | Beijing Tian Tan Hospital, Capital Medical University                                                        | Zhongrong Miao       |
|                      | Beijing Tian Tan Hospital, Capital Medical University                                                        | Yilong Wang          |
|                      | Beijing Tian Tan Hospital, Capital Medical University                                                        | Yongjun Wang         |
|                      | Comprehensive Stroke Center, University of California, Irvine, USA                                           | Wengui Yu            |
|                      | Beijing Tian Tan Hospital, Capital Medical University                                                        | Xingquan Zhao        |
|                      | Neurovascular Imaging Research Core and Department of Neurology, University of California, USA               | David S Liebeskind   |
|                      | Department of Neurosurgery, Neuropsychiatric Institute, University of Illinois at Chicago, USA               | Sepideh Amin-Hanjani |
